# Supplementary material for: Toll-like Receptor 2 Mediates VEGF Overexpression and Mesothelial Hyperpermeability in Tuberculous Pleural Effusion
Source: MDPI journal article supplement (doi:10.3390/ijms24032846), 2023-02-02
Supplement: s1 [file s1]

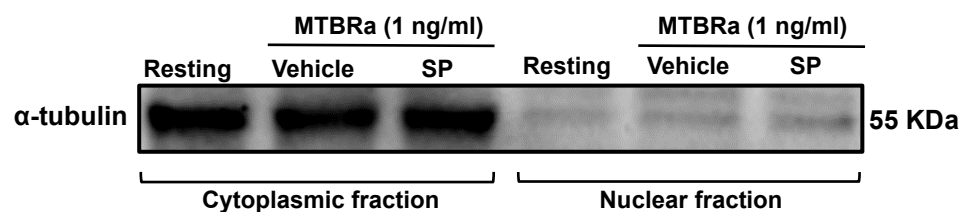

**Figure S1.** Verification of no cytoplasmic contamination in the isolated nuclear fraction of MeT-5A human pleural mesothelial cells treated with vehicle or SP 10  $\mu$ M followed by MTBRa treatment for 15 min. The cytoplasmic contamination in the isolated nuclear fraction was determined by western blotting, using  $\alpha$ -tubulin as the cytoplasmic probe. SP, SP600125.
