# Supplementary material for: Toll-like Receptor 2 Mediates VEGF Overexpression and Mesothelial Hyperpermeability in Tuberculous Pleural Effusion
Source: MDPI journal article supplement (doi:10.3390/ijms24032846), 2023-02-02
Supplement: s1 [file s1]

Table S1. Raw denstiometric data

A

|         | R    | 0.1   | 1     | 10    |
|---------|------|-------|-------|-------|
| VEGF    | 1    | 0.983 | 1.647 | 1.32  |
| Tubulin | 1    | 0.943 | 1.086 | 1.064 |
|         | 1.00 | 1.04  | 1.52  | 1.24  |
|         |      |       |       |       |
|         | R    | 0.1   | 1     | 10    |
| VEGF    | 1    | 1.273 | 1.724 | 1.18  |
| Tubulin | 1    | 0.953 | 1.025 | 0.983 |
|         | 1.00 | 1.34  | 1.68  | 1.20  |
|         |      |       |       |       |
|         |      |       |       |       |
|         | R    | 0.1   | 1     | 10    |
| VEGF    | 1.00 | 1.43  | 1.53  | 1.11  |
| Tubulin | 1.00 | 0.91  | 0.93  | 1.02  |
|         | 1.00 | 1.56  | 1.64  | 1.09  |
|         |      |       |       |       |

B

|         | R    | V     | Par   | LY    | PD    | SB    | SP    |
|---------|------|-------|-------|-------|-------|-------|-------|
| VEGF    | 1    | 1.404 | 1.284 | 1.447 | 1.181 | 1.043 | 0.699 |
| Tubulin | 1    | 1.006 | 0.841 | 0.926 | 0.836 | 0.975 | 1.105 |
|         | 1.00 | 1.40  | 1.53  | 1.56  | 1.41  | 1.07  | 0.63  |
|         |      |       |       |       |       |       |       |
|         | R    | V     | Par   | LY    | PD    | SB    | SP    |
| VEGF    | 1    | 1.451 | 1.482 | 1.684 | 1.496 | 1.623 | 1.304 |
| Tubulin | 1    | 0.94  | 1.012 | 1.072 | 1.079 | 1.22  | 1.4   |
|         | 1.00 | 1.54  | 1.46  | 1.57  | 1.39  | 1.33  | 0.93  |
|         |      |       |       |       |       |       |       |
|         |      |       |       |       |       |       |       |
|         | R    | V     | Par   | LY    | PD    | SB    | SP    |
| VEGF    | 1    | 1.364 | 1.616 | 1.293 | 1.739 | 1.368 | 0.825 |
| Tubulin | 1    | 0.921 | 1.068 | 1.022 | 0.996 | 1.038 | 0.989 |
|         | 1.00 | 1.48  | 1.51  | 1.27  | 1.75  | 1.32  | 0.83  |
|         |      |       |       |       |       |       |       |

C

|       | R    | 1    | 5    | 15   | 30   |
|-------|------|------|------|------|------|
| P-JNK | 1    | 0.95 | 1.98 | 1.49 | 0.74 |
| T-JNK | 1    | 0.95 | 0.98 | 0.95 | 1.05 |
|       | 1.00 | 1.00 | 2.02 | 1.57 | 0.70 |
|       |      |      |      |      |      |
|       | R    | 1    | 5    | 15   | 30   |
| P-JNK | 1    | 0.95 | 1.84 | 1.25 | 0.66 |
| T-JNK | 1    | 0.78 | 0.9  | 0.78 | 0.9  |
|       | 1.00 | 1.22 | 2.04 | 1.60 | 0.73 |
|       |      |      |      |      |      |
|       | R    | 1    | 5    | 15   | 30   |
| P-JNK | 1    | 1.51 | 1.88 | 2    | 0.82 |
| T-JNK | 1    | 1.06 | 1.09 | 1.08 | 1.27 |
|       | 1.00 | 1.42 | 1.72 | 1.85 | 0.65 |
|       |      |      |      |      |      |

D

|       | R    | Vehicle | SP 10 |
|-------|------|---------|-------|
| VEGF  | 1    | 1.936   | 1.907 |
| GAPDH | 1    | 0.973   | 1.015 |
|       | 1.00 | 1.99    | 1.88  |
|       |      |         |       |
|       | R    | Vehicle | SP 10 |
| VEGF  | 1    | 2.331   | 1.937 |
| GAPDH | 1    | 0.948   | 1.025 |
|       | 1.00 | 2.46    | 1.89  |
|       |      |         |       |
|       | R    | Vehicle | SP 10 |
| VEGF  | 1    | 2.238   | 2.129 |
| GAPDH | 1    | 0.948   | 1.025 |
|       | 1.00 | 2.36    | 2.08  |
|       |      |         |       |
