# Supplementary material for: Toll-like Receptor 2 Mediates VEGF Overexpression and Mesothelial Hyperpermeability in Tuberculous Pleural Effusion
Source: MDPI journal article supplement (doi:10.3390/ijms24032846), 2023-02-02
Supplement: s1 [file s1]

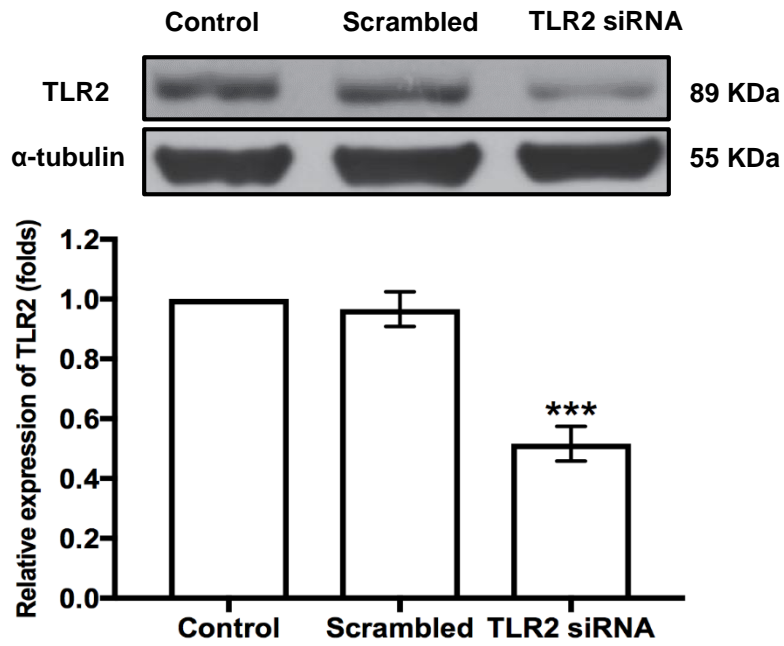

**Figure S2.** MeT-5A human pleural mesothelial cells were transfected with scrambled siRNA or TLR2 siRNA (25 nM) for 48 hours, then TLR2 and  $\alpha$ -tubulin proteins were determined by western blotting. Data are representative of three separate experiments. \*\*\*  $p < 0.001$  compared with scrambled siRNA group.
